1 **Agricultural pressures impair trophic link between aquatic microorganisms**  
2 **and invertebrates**

3

4 **Rody Blom<sup>1,2</sup>, S. Henrik Barmantlo<sup>1,3</sup>, Maarten J.J. Schrama<sup>1</sup>, Ellard R. Hunting<sup>4,5\*</sup>**

5

6 *<sup>1</sup> Institute of Environmental Sciences (CML), Leiden University, Leiden, The Netherlands*

7 *<sup>2</sup> Laboratory of Entomology, Wageningen University and Research, Wageningen, The*  
8 *Netherlands.*

9 *<sup>3</sup> Department of Ecosystem and Landscape Dynamics, Institute for Biodiversity and Ecosystem*  
10 *Dynamics, University of Amsterdam, Amsterdam, The Netherlands.*

11 *<sup>4</sup> School of Biological Sciences, University of Bristol, 24 Tyndall Avenue, Bristol BS8 1TQ,*  
12 *UK*

13 *<sup>5</sup> Laboratory of Applied Microbiology, University of Applied Sciences and Arts of Southern*  
14 *Switzerland, Bellinzona, Switzerland*

15

16 **\*Correspondence:**

17 [e.r.hunting@bristol.ac.uk](mailto:e.r.hunting@bristol.ac.uk)

18

19 **Main finding:** *Under laboratory and field conditions, we uncover how invertebrate feeding*  
20 *on microbial decomposition are two intertwined ecosystem processes that present a currently*  
21 *underappreciated trophic link vulnerable to agricultural chemicals.*

22

23

24 **Abstract:** Decadal declines in aquatic ecosystem health prompted monitoring efforts and  
25 studies on effects of human practices on aquatic biodiversity, yet a consideration of ecological  
26 processes and trophic linkages is increasingly required to develop an in-depth understanding of  
27 aquatic food webs and its vulnerability to human activities. Here, we test in laboratory  
28 incubations using natural organic matter whether agricultural practices have an effect on two  
29 interacting ecological processes (i.e., decomposition and invertebrate growth) as the relevant  
30 temporal components of the trophic linkage between aquatic microbial communities and  
31 aquatic invertebrates. We further assess whether these altered trophic interactions are visible on  
32 ecologically relevant scales. We observed clear patterns in agricultural constraints on microbial  
33 decomposition, which coincided with reduced invertebrate growth and an unexpected increase  
34 in invertebrate consumption of organic matter. Similar differences in invertebrate length  
35 depending on land use were observed in our field survey, thereby providing important clues on  
36 the relevance and vulnerability of interdependent processes that can serve to improve future  
37 forays in monitoring ecosystem health.

38

39 **Keywords:**

40 *Asellus aquaticus, decomposition, DECOTAB, ecosystem functioning, organic matter,*  
41 *microorganisms*

## 42 **Introduction**

43 Globally, anthropogenic activities pose significant threats to aquatic ecosystems  
44 (Strayer & Dudgeon, 2010; Vörösmarty et al., 2010; Strayer, 2010a). Resulting declines in  
45 ecosystem health have fueled monitoring activities, which are primarily aimed at quantifying  
46 biodiversity and ecosystem processes to allow for diagnosing perturbations and safeguarding  
47 the natural environment. A key ecosystem process proven vulnerable to such stressors is the  
48 degradation of dead organic matter (OM), such as decaying plant litter, that serves as food for  
49 aquatic microorganisms and invertebrates (Webster & Benfield, 1986; Wallace & Webster,  
50 1996; Bundschuh & McKie, 2016). This process relies on a complex interplay between  
51 microorganisms and invertebrates where microbial conditioning of OM enhances nutritional  
52 value for invertebrates, while consumption of OM by invertebrates renders a diverse size range  
53 of dissolved and particulate OM that supports microorganism as well as filter-and deposit  
54 feeding invertebrates (Barlöcher, 1985; Graça et al., 1993; Graça, 2001; Wright & Covich 2005;  
55 Danger et al., 2012; Danger et al., 2012; Arce Funck et al., 2015; Vonk et al., 2016; Bundschuh  
56 & McKie, 2016). While most studies and monitoring efforts focus on diversity measures such  
57 as species abundances within a single trophic level, an explicit consideration of the complexity  
58 of interactions is now crucial to develop an in-depth understanding of aquatic food webs and  
59 its vulnerability to human activities (Hines et al., 2016; Schrama et al., 2017; Seibold et al.,  
60 2018; Bruder et al., 2019).

61 Agricultural practices are a primary source of pollution to aquatic systems. This is due to  
62 the use of chemicals such as pesticides and fertilizer that run-off to adjacent aquatic systems  
63 where they can have direct- or indirect toxic effects in the water column or associate with OM  
64 accumulating in their sediments (e.g., Knezovich et al., 1987; Vijver et al., 2017). To date,  
65 studies aimed at assessing effects of agricultural practices mostly focussed on direct effects  
66 (e.g., toxicity) to aquatic invertebrates, while studies focused on indirect effects of chemicals

67 on invertebrates relied predominantly on feeding preference experiments and singled-out  
68 chemicals that are often applied to the overlying water (e.g. Feckler et al., 2016; Vijver et  
69 al., 2017; Rossi et al., 2018; Barmantlo et al., 2018, 2019). This approach prevents the  
70 distinction between direct and indirect effects on microbially-mediated trophic linkages that  
71 are caused by chemical deposition and sorption of chemical to OM on temporal scales that are  
72 relevant to ecosystem processes.

73         Since various chemicals have been observed to affect microbial community composition  
74 and diversity (Gardeström et al., 2016; Tlili et al., 2016; Hunting et al., 2017a, Fasching et al.,  
75 2019), alterations in microbial diversity can be expected to affect the overall rate of microbial  
76 decomposition. This is relevant since the process of microbial decomposition, in contrast to  
77 microbial diversity, provides a more reliable reflection of OM-conditioning and available  
78 microbial biomass, and therewith the resources available for invertebrates, for the time period  
79 (seasons to years) that is required for OM to decompose and invertebrates to develop (e.g.,  
80 Hines et al., 2016). However, as with invertebrates, the vast majority of studies on microbial  
81 communities rely on single time point characterization of microbial diversity or exposure to  
82 manipulated concentrations of model chemical compounds. It thus remains uncertain whether  
83 complex mixtures of organic particles and pollutants currently present in the environment  
84 translate to altered microbial processes, and whether changes in the temporal attributes of  
85 microbial processing of OM affect invertebrate performance.

86         This study tests whether the chemical complexity associated with agricultural practices  
87 affects microbial processing of OM and if this translates to aquatic invertebrates that rely on  
88 microbial biomass and microbial conditioning of OM. To this end, we assessed the effects of  
89 agricultural practices on 1) the contribution of microbial communities on decomposition of OM  
90 derived from an agricultural area, and 2) how changes in OM microbial decomposition affect  
91 the growth of the aquatic invertebrate *Asellus aquaticus* under controlled laboratory conditions.

92 Finally, we surveyed *A. aquaticus*' body length in relation to agricultural practices within the  
93 same agricultural area.

94

## 95 **Material and methods**

96 Experimental approach and research setting: We performed both a laboratory feeding  
97 experiment and a field survey to determine the effect of agricultural practices on microbial OM  
98 decomposition and invertebrate growth. In both components of the study, we exposed *Asellus*  
99 *aquaticus* individuals to OM-rich sediments originating from ditches adjacent to the three key  
100 types of land use present in an agricultural area, 'Bollenstreek', the Netherlands (Lat:  
101 52°15'55.66", Long: 4°28'27.94"), that have well-documented effects on microbial community  
102 structure and decomposition (Hunting et al., 2016; 2017a). Land uses selected were a dune  
103 nature reserve, agricultural sites growing flower bulb (hyacinths, lilies, tulips and daffodils) and  
104 permanent grassland. The agricultural area is intensively used to grow flower bulbs, which are  
105 treated with pesticides and nutrients between February to November. The ditches are adjacent  
106 to the flower bulb fields, which results in the transfer of pesticides and nutrients from the fields  
107 into the ditches. The grassland pastures are used for grazing by livestock. Natural sandy dunes  
108 can be found to the north and north-west of the area at approximately 200m from the ditches.  
109 The water bodies located in this area are hydrologically isolated from the agricultural area  
110 because of a natural elevation gradient (Ieromina et al., 2015). All water bodies are  
111 characterized by a wide variety of aquatic invertebrates (Ieromina et al., 2015; Hunting et al.,  
112 2016).

113

114 Feeding experiment: To assess whether changes in microbial decomposition of OM affect the  
115 growth of aquatic invertebrates, we performed a laboratory feeding assay where we placed

116 *Asellus aquaticus* (being a common detritivore in many freshwater habitats) on a diet of OM  
117 collected from ditches adjacent to either flower bulb fields, grasslands or pristine dune area. *A.*  
118 *aquaticus* was chosen as a model organism as it is a highly abundant detritivore in aquatic ditch  
119 systems. We prepared Decomposition and Consumption Tablets (DECOTABs) as standardized  
120 OM substrate as described by Kampfraath et al. (2012) and Van der Lee (2020). In brief,  
121 DECOTABs ( $\phi$ 17 mm) were prepared from naturally-derived OM embedded in an agar matrix,  
122 containing OM derived from sediments adjacent to flower bulb fields, grasslands or pristine  
123 dune area. DECOTABs were prepared as explained in detail in Hunting et al., 2016. Individuals  
124 of *A. aquaticus* used in the experiment were reared in the laboratory. Prior to the experiment,  
125 an egg-carrying female was isolated and placed in Elendt M4 medium (OECD, 2004) on a small  
126 layer (~1 cm) of fine quartz sand. In total, 36 neonates of *A. aquaticus* were collected directly  
127 after hatching. As such, all collected neonates were from the same spawn which limits variation  
128 in body length between individuals at the start of the experiment. Subsequently, neonates were  
129 placed in 50 mL glass bottles individually, which were filled with 35 mL Elendt M4 medium.  
130 One DECOTAB was added to each bottle. In total, 36 bottles containing one *A. aquaticus*  
131 neonate and one DECOTAB each ( $n = 12$  per land use type) were used in the experiment.  
132 Additionally, per treatment, three control bottles containing one DECOTAB and without  
133 invertebrates were used to assess substrate dependent microbial decomposition rates. The  
134 experiment was conducted at a constant temperature of 18 °C and a light-dark regime of 16:8  
135 hours for the duration of 42 days. Elendt M4 medium was replaced with freshly prepared  
136 medium every seven days. Physicochemical parameters (pH, dissolved oxygen, electrical  
137 conductivity, and temperature) were measured weekly using a HACH HQ40D electronic multi  
138 meter to ensure they were comparable between treatments throughout the experiment (data not  
139 shown). From  $t=14$  onwards, *A. aquaticus* individuals were photographed every seven days  
140 using an eScope DP-M17 USB-microscope camera to monitor growth rates. Subsequently, *A.*

141 *aquaticus* body length was quantified by measuring from cephalothorax to pleotelson from a  
142 dorsal perspective using ImageJ (v1.47). Potential effects of DECOTABs per land use, time (in  
143 days), and their respective interaction on *A. aquaticus*' body length were analyzed using a linear  
144 mixed effect model in R (R Core Team, 2019), with the individual animals added as random  
145 variable (to account for the repeated measures design). To meet the assumption of normality of  
146 the model residuals and the random variable, body length data was log<sub>10</sub> transformed.  
147 Furthermore, analysis of mortality data was performed by means of a logistic regression. After  
148 termination of the experiment (42 days after inoculation), remaining DECOTAB material was  
149 collected, dried at 60 °C for 48 hours and weighed on a balance (BP210S, Sartorius AG). In  
150 addition, DECOTABs which were only exposed to substrate-dependent microbial  
151 decomposition were dried and weighed following the same protocol. In order to assess initial  
152 DECOTAB weight, ten unused DECOTABs per treatment were dried and weighed following  
153 the same. Thereafter, both microbial decomposition and isopod consumption of OM was  
154 analyzed using a one way-ANOVA with a Tukey HSD post-hoc test.

155

156 Field survey: To determine the effect of agricultural practices on aquatic invertebrate growth  
157 in the field, we collected *A. aquaticus* individuals from the top sediment layer by grab sampling  
158 using a 500µm dipping net at the same sites where the organic material for the lab experiment  
159 was retrieved. All specimens were collected on the same day in June 2016. At each of the three  
160 sites corresponding with the three types of land use (bulb, grassland, and pristine dune area),  
161 roughly 20 *A. aquaticus* individuals were collected, with a total of 57 individuals. Sexes were  
162 determined by examining the morphological properties as described by Bertin & Cézilly (2003).  
163 Individual *A. aquaticus* collected from the field were photographed and measured as stated  
164 earlier. An analysis of the effect of land use adjacent to the habitat on the body length of field-  
165 collected *A. aquaticus* was conducted using a one-way ANOVA model with length of each

166 specimen as a dependent variable and land use as a predictor. Because *A. aquaticus* sexes  
167 typically differ in body length, we carried out separate analyses for both sexes.

168

169 Agricultural practices in the study area have well documented effects on microbial  
170 decomposition and community composition (Hunting et al., 2016; 2017a). A full assessment of  
171 microbial parameters was therefore considered to be superfluous and beyond the scope of this  
172 study. To confirm that agricultural practices in the study area differentially affected microbial  
173 communities during this study period, we measured carbon utilization profiles of sediment  
174 bacteria as a proxy of microbial functional (metabolic) diversity using Ecoplates (Biolog).  
175 Ecoplates are comprised of ecologically relevant, structurally diverse compounds, yet do not  
176 include e.g., recalcitrant substrates nor specific substrates typical of the soils used in this study.  
177 It is therefore impossible to directly relate substrate utilization profiles to the actual functioning  
178 of the soil microbial communities. Nonetheless, the number of substrates used can serve as a  
179 proxy of the metabolic diversity of the microbial community (Garland, 1999). To this end,  
180 microbial communities were sampled from sediments adjacent to dunes, grasslands, and bulb  
181 fields (6 replicates per treatment). One mL of sediment was diluted 50 times with demineralized  
182 water and vortexed. Mineral substrate was allowed to settle and subsequently distributed over  
183 well plates (Biolog, Ecoplate) within 2 hours after sampling. Plates were incubated for 96 h at  
184 18°C and absorbance was measured using a standard plate reader. Carbon utilization profiles  
185 were analyzed using principal component analysis and a Jaccard-based one-way analysis of  
186 similarity (ANOSIM).

187

## 188 **Results**

189 After 42 days of incubation, *Asellus aquaticus* contributed significantly (ANOVA,  $F =$   
190 56.8,  $p < 0.001$ ) more to DECOTAB mass loss, when compared to DECOTAB exposed solely



191 to microbial biofilms (Fig 1A). A shift in relative contributions to OM degradation becomes  
192 evident when plotting the ratio of microbial decomposition and isopod-associated OM  
193 consumption (Fig 1B), illustrating a shift towards a higher contribution of microbial  
194 decomposition to OM degradation. Isopods contributed to 37.8% of biomass loss of dune-  
195 derived OM, whereas they contributed to 85.2% and 90.3% of biomass loss in bulb field- and  
196 grassland-derived OM, respectively. We observed major differences between the ratios of  
197 microbial decomposition and isopod-associated degradation of bulb field- and grassland  
198 derived OM on the one hand and dune-derived OM on the other hand.  
199

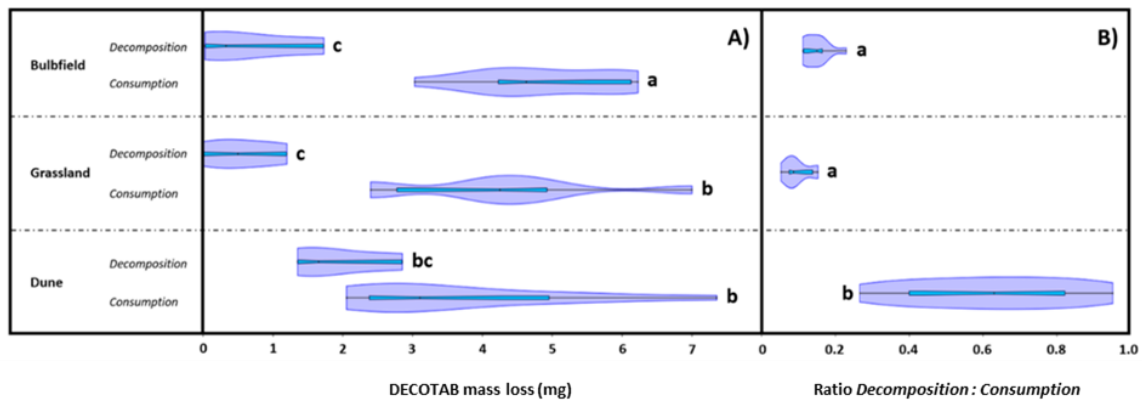

200  
201 **Figure 1.** Organic matter mass loss after 42 days of microbial decomposition ( $\pm$  SE,  $n = 3$  for dune, grass and  
202 bulb) for each land use type (ANOVA; significance level  $p = 0.05$ ) and *Asellus aquaticus* consumption (A;  $\pm$  SE,  
203  $n = 12$  for dune,  $n = 8$  for grass, and  $n = 11$  for bulb; only surviving individuals are shown) and ratio between  
204 microbial decomposition and isopod consumption of organic matter (B).  
205

206 Over the course of 42 days, we observed that *A. aquaticus* feeding on OM derived from  
207 the dune area had significantly higher growth rates compared to *A. aquaticus* that fed on  
208 DECOTABs with grass- or bulb OM (TukeyHSD:  $p_{\text{dune-bulb}} < 0.001$  and  $p_{\text{dune-grass}} < 0.001$ ),  
209 whereas no difference in growth rates was observed between *A. aquaticus* that fed on bulb-and  
210 grass OM (TukeyHSD:  $p = 0.377$ ; Fig. 2). In addition, *A. aquaticus* that fed on grassland-

211 derived OM had lower survival (66.7%) at the end of the experiment compared to juveniles that  
212 fed on dune- (100%) and/or bulb (91.7%) derived OM (Chi-square,  $p = 0.03$ ).

213

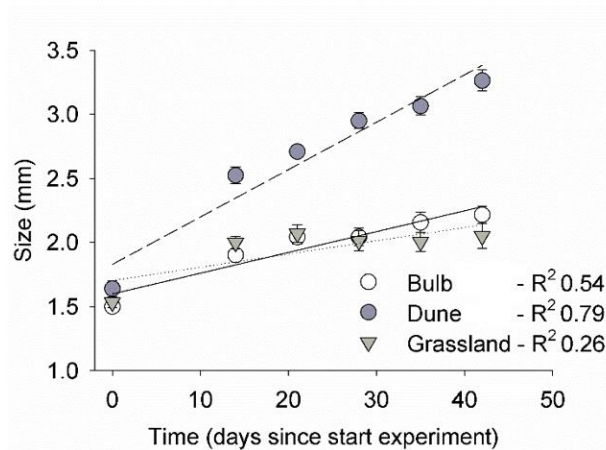

214

215 **Figure 2.** Body length ( $\pm$  SE,  $n = 12$ ) of *Asellus aquaticus* during 42 days of incubation feeding on DECOTABs  
216 inoculated with organic matter from ditches adjacent to bulb fields ( $y = 1.69 + 0.011x$ ), pristine dune area ( $y$   
217  $=1.82+0.037x$ ) grassland ( $y = 1.59 + 0.0163x$ ) (LME, significance level  $p = 0.05$ ). On average, *A. aquaticus* which  
218 fed on organic matter collected from ditches adjacent to pristine dune areas displayed a significantly higher growth  
219 rate in comparison to those which fed on organic matter collected from ditches adjacent to bulb fields and  
220 grasslands.

221

222 In our field survey, we observed differences in microbial carbon utilization profiles  
223 depending on land use (Fig. 3A: ANOSIM;  $p < 0.05$ ). This indicates differences in metabolic-  
224 and functional diversity of microbial communities between land use types. Analysis of body  
225 length of both sexes combined suggests an effect of land use, as individuals collected from the  
226 dune area were larger than those collected from the bulb- and grassland area (LME,  $p = 0.042$ ).  
227 Males constituted the majority of the collected *A. aquaticus* individuals were (40 males vs 17  
228 females). Male *A. aquaticus* were larger than female individuals (figure 3BC), which is  
229 commonly observed for this species (Bertin & Cézilly, 2003). Body length of *A. aquaticus*  
230 collected from the dune area were largest, and those from the grassland area were the smallest;

231 individuals from bulb fields were of intermediate length and did not appear to differ from  
232 individuals from other land uses. This pattern was only observed in male individuals (Fig. 3B:  
233 TukeyHSD:  $p_{\text{dune vs grass}} < 0.001$ ,  $p_{\text{grass vs bulb}} = 0.03$ ). Female individuals collected from grassland  
234 ditches were smaller compared to individuals collected from ditches in dune areas (Fig. 3C:  
235 TukeyHSD:  $p_{\text{dune-grass}} = 0.049$ ).

236

237

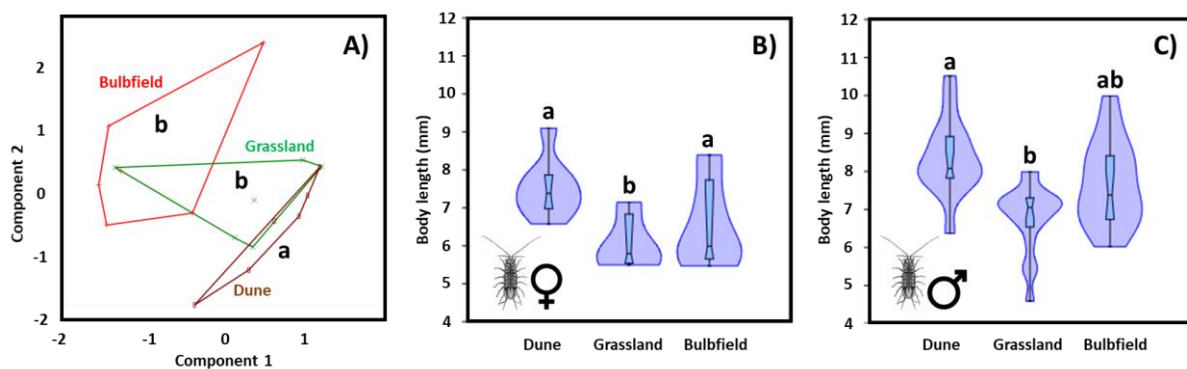

238

239 **Figure 3.** Microbial carbon utilization profiles of microbial communities extracted from sediments collected from  
240 ditches adjacent to dune-, bulb field- and grassland areas (A;  $n = 6$ ; ANOSIM;  $p < 0.05$ ) and average body length  
241 ( $\pm$  SE, B:  $n = 5-8$ ; C:  $n = 14-18$ ; ANOVA + Tukey post-hoc; significance level  $p = 0.05$ ) of female (B) and male  
242 (C) *Asellus aquaticus* collected from ditches adjacent to a pristine dune area, grasslands and bulb fields.  
243 Corresponding letters indicate statistical similarity.

244

245

## 246 **Discussion**

247           This study tested whether agricultural practices have an effect on two ecological  
248 processes (i.e., decomposition and invertebrate growth) that represent relevant temporal  
249 components of the trophic linkage between aquatic microbial communities and aquatic  
250 invertebrates, and assessed whether potential alterations are visible on ecologically relevant  
251 scales. We observed clear patterns in agricultural practices on microbial decomposition of OM  
252 collected in the field, which cascaded to effects on higher trophic levels by reduced invertebrate  
253 growth of both laboratory incubated and field-collected invertebrates. This carries implications  
254 for a range of ecological settings and current assessments of ecosystem health.

255           While microbial communities in natural systems are often considered resilient to natural  
256 disturbances and species loss due to a certain level of functional redundancy (e.g., Langenheder  
257 et al., 2005), a wide array of chemical pressures (e.g., agricultural chemicals and nanoparticles)  
258 have been shown to govern microbial community assembly and decomposition (Tlili et al.,  
259 2016; Hunting et al., 2016; 2017a; Zhai et al. 2018;). Here, we also observed microbial  
260 communities in the field to differ in their metabolic potential, and OM collected in the field to  
261 differ in microbial decomposition depending on the type of agricultural practices. In addition  
262 to direct toxic effects of chemicals, different organic practices result in differences in OM-  
263 subsidy (e.g., different crops) as well as sorption of agricultural chemicals to OM, affecting  
264 both quantity and quality of OM. This is relevant as microbial community assembly and  
265 processes are frequently observed to be driven by quality of the available OM resources (e.g.,  
266 Myers et al., 2001; Docherty et al., 2006; Strickland et al., 2009; Hunting et al., 2013). The  
267 observed adverse effects of agricultural chemical on microbial decomposition of OM may be  
268 relevant to a wide array of chemicals present in agricultural catchments, provided hydrophobic  
269 fungicides can also inhibit fungal hyphomycete growth and microbial community composition  
270 (Zubrod et al., 2015; Korschak et al., 2019).

271 In contrast to measures of microbial diversity, decomposition rates provide a more  
272 reliable reflection of the available microbial biomass over extended periods of time. To assess  
273 whether differences in microbial decomposition translate to differential performances in a  
274 higher trophic level, growth rates of *Asellus aquaticus* were measured in relation to OM  
275 decomposition. We observed that *A. aquaticus* performed better when feeding on OM derived  
276 from dunes compared to bulb- and grassland-derived OM. This suggests invertebrate growth  
277 follows similar patterns as microbial decomposition depending on type of land use, i.e., higher  
278 growth rates with higher microbial decomposition rates. Dissimilarities in palatability and  
279 nutritional value between the different OM sources and their associated microbial communities  
280 can thus become visibly in invertebrate growth and size. While direct effects of chemicals and  
281 their metabolites present in the OM on invertebrate performance cannot be excluded (Zubrod  
282 et al., 2010), reduced growth rates have been causally linked to an absence of OM-associated  
283 microorganisms, emphasizing the importance of microorganisms in the diet of invertebrate  
284 shredders (Zhai et al. 2018). This corroborates the notion that colonization and conditioning of  
285 OM by microorganisms plays an important role in invertebrate nutrition and invertebrate-  
286 mediated consumption of OM (Graça et al., 1993; Graça, 2001; Wright & Covich 2005; Danger  
287 et al., 2012; Hines et al., 2016), and suggests that observed growth reductions in response to  
288 agricultural practices is due to a decrease in microbial biomass availability over the course of  
289 the experiment. This seems to have prompted *A. aquaticus* to feed directly on OM rather than  
290 microbial biomass, as we observed an unexpected increase in consumption of bulb- and  
291 grassland-derived OM that apparently contained fewer essential nutrients such as fatty acids  
292 and proteins to support growth. This points to a currently underappreciated compensatory  
293 feeding mechanism in invertebrates in response to microbial perturbations.

294 Conventional monitoring efforts aimed at assessing ecosystem health generally relies  
295 on single time point quantification of species diversity and abundance with a large emphasis on

296 invertebrates (Hunting et al., 2017b). Often, stressor-induced effects are not directly reflected  
297 by species diversity and abundance alone, but also by characteristics related to species-specific  
298 life-history, such as body length, that capture the long-term result of exposure to stress (Culp et  
299 al., 2010; Hines et al., 2016). Here, agricultural practices were observed to have an effect on  
300 two ecological processes (i.e., decomposition and invertebrate growth) that capture the temporal  
301 complexity of the trophic linkage between aquatic microbial communities and aquatic  
302 invertebrates. The observed adverse effects of agricultural stressors on the performance of OM-  
303 associated microbial communities and invertebrates likely ripples through the food web as it  
304 forms a key source of fine particulate OM for filter- and deposit feeding invertebrates  
305 (Bundschuh & McKie, 2016). Impaired invertebrate growth rates may also lead to reduced  
306 biomass available for predators that rely on invertebrate shredders as food source, such as fish  
307 (Rask & Hiisivuori, 1985) and invertebrate predators (Herrmann, 1984; Krisp & Maier, 2005).  
308 In other words, current monitoring efforts that rely on single time point estimation of  
309 invertebrate abundances fail to capture the temporal nature and complexity of trophic  
310 interactions (e.g., knock-on effects on growth rate and other fitness variables) that ultimately  
311 govern the functioning and health of ecosystems. Thus, the likelihood that monitoring efforts  
312 can lead to misinterpretations of ecosystem health assessments calls for reconsidering our  
313 approaches in biodiversity assessments and environmental diagnostics.

## 314 **Conclusion**

315 Using OM that encapsulates the naturally relevant complexity of agricultural chemicals  
316 entering adjacent water bodies, this study shows that agricultural practices can reduce the  
317 contribution of microbial communities to OM degradation, which can coincide with a reduction  
318 in growth rates of the aquatic invertebrate *A. aquaticus* as assessed under controlled laboratory  
319 conditions. Quantifying length of *A. aquaticus* in the field in ditches adjacent to different  
320 agricultural practices reveals that the patterns observed in our laboratory study reflect those

321 occurring in natural systems. In a context of natural complexity and interdependence of  
322 ecological processes, these results suggest that agricultural chemicals can impair trophic  
323 linkages between OM-associated microbial communities and invertebrates.

324

#### 325 **Ethics approval and consent to participate**

326 Not applicable.

327

#### 328 **Consent for publication**

329 Not applicable.

330

#### 331 **Availability of data and material**

332 The datasets and/or scripts used for data analysis are available upon request.

333

#### 334 **Competing interests**

335 The authors state that they have no conflict of interest.

336

#### 337 **Funding**

338 The study did not receive external funding.

339

#### 340 **References**

341 Arce Funck, J., Bec, A., Perrière, F., Felten, V., & Danger, M. (2015). Aquatic hyphomycetes: A  
342 potential source of polyunsaturated fatty acids in detritus-based stream food webs. *Fungal*  
343 *Ecology*, 13, 205–210. <https://doi.org/10.1016/j.funeco.2014.09.004>

344 Barlöcher, F. (1985). The role of fungi in the nutrition of stream invertebrates. *Botanical Journal of*  
345 *the Linnean Society*, 91(1–2), 83–94.

346 Barmantlo, S. H., Parmentier, E. M., de Snoo, G. R., & Vijver, M. G. (2018). Thioclopid-Induced

- 347 Toxicity Influenced by Nutrients; Evidence from In Situ Bioassays in Experimental Ditches.  
348 *Environmental Toxicology and Chemistry*, 9999(9999), 1–9. <https://doi.org/10.1002/etc.4142>
- 349 Barmantlo, S. H., Schrama, M., van Bodegom, P. M., de Snoo, G. R., Musters, C. J. M., & Vijver, M.  
350 G. (2019). Neonicotinoids and fertilizers jointly structure naturally assembled freshwater  
351 macroinvertebrate communities. *Science of the Total Environment*, 691, 36–44.  
352 <https://doi.org/10.1016/j.scitotenv.2019.07.110>
- 353 Bertin, A., & Cézilly, F. (2003). Sexual selection, antennae length and the mating advantage of large  
354 males in *Asellus aquaticus*. *Journal of Evolutionary Biology*, 16(3), 491–500.  
355 <https://doi.org/10.1046/j.1420-9101.2003.00536.x>
- 356 Bruder, A., Frainer, A., Rota, T., & Primicerio, R. (2019). The importance of ecological networks in  
357 multiple-stressor research and management. *Frontiers in Environmental Science*, 7, 59.
- 358 Bundschuh, M., & McKie, B. G. (2016). An ecological and ecotoxicological perspective on fine  
359 particulate organic matter in streams. *Freshwater Biology*, 61(12), 2063–2074.  
360 <https://doi.org/10.1111/fwb.12608>
- 361 Culp, J. M., Armanini, D. G., Dunbar, M. J., Orlofske, J. M., LeRoy Poff, N., Pollard, A. I., ... Hose,  
362 G. C. (2010). Incorporating traits in aquatic biomonitoring to enhance causal diagnosis and  
363 prediction. *Integrated Environmental Assessment and Management*, 7(2), 187–197.  
364 <https://doi.org/10.1002/ieam.128>
- 365 Docherty, K. M., Young, K. C., Maurice, P. A., and Bridgham, S. D. (2006). Dissolved organic matter  
366 concentration and quality influences upon structure and function of freshwater microbial  
367 communities. *Microb. Ecol.* 52, 378–388. doi: 10.1007/s00248-006-9089-x
- 368 Fasching, C., Akotoye, C., Bižić, M., Fonvielle, J., Ionescu, D., Mathavarajah, S., ... Xenopoulos, M.  
369 A. (2019). Linking stream microbial community functional genes to dissolved organic matter and  
370 inorganic nutrients. *Limnology and Oceanography*, (Findlay 2010), Ino.11356.  
371 <https://doi.org/10.1002/Ino.11356>
- 372 Garland, J. L. (1999). “Potential and limitations of BIOLOG for microbial community analysis,” in  
373 Proceedings of the 8th International Symposium on Microbial Ecology, Microbial Biosystems:  
374 New Frontiers, eds C. R. Bell, M. Brylinski, and P. Johnson-Green (Halifax: Atlantic Canada



- 375 Society for Microbial Ecology), 1–7.
- 376 Graça, M. A S, Maltby, L., & Calow, P. (1993). Importance of fungi in the diet of *Gammarus pulex*  
377 and *Asellus aquaticus* I: feeding strategies. *Oecologia*, 93(1), 139–144.  
378 <https://doi.org/10.1007/BF00321203>
- 379 Graça, Manuel A.S. (2001). The role of invertebrates on leaf litter decomposition in streams - A  
380 review. *International Review of Hydrobiology*, 86(4–5), 383–393. [https://doi.org/10.1002/1522-  
381 2632\(200107\)86:4/5<383::AID-IROH383>3.0.CO;2-D](https://doi.org/10.1002/1522-2632(200107)86:4/5<383::AID-IROH383>3.0.CO;2-D)
- 382 Herrmann, J. (1984). Factors affecting the occurrence of *Dendrocoelum lacteum* (Turbellaria) in  
383 Swedish lakes. *Hydrobiologia*, 114(1), 3–8. <https://doi.org/10.1007/BF00016595>
- 384 Hines, J., Reyes, M., & Gessner, M. O. (2016). Density constrains cascading consequences of  
385 warming and nitrogen from invertebrate growth to litter decomposition. *Ecology*, 97(7), 1635-  
386 1642.
- 387 Hunting, E. R., C. M. White, M. van Gemert, D. Mes, E. Stam, H. G. van der Geest, M. H. S. Kraak,  
388 and W. Admiraal. (2013). UV radiation and organic matter composition shape bacterial  
389 functional diversity in sediments. *Frontiers in Microbiology* 4:317. DOI:  
390 [10.3389/fmicb.2013.00317](https://doi.org/10.3389/fmicb.2013.00317).
- 391 Hunting, E. R., Vonk, J. A., Musters, C. J. M., Kraak, M. H. S., & Vijver, M. G. (2016). Effects of  
392 agricultural practices on organic matter degradation in ditches. *Scientific Reports*, 6(February),  
393 21474. <https://doi.org/10.1038/srep21474>
- 394 Hunting, E. R., Barmantlo, S. H., Schrama, M., van Bodegom, P. M., Zhai, Y., & Vijver, M. G.  
395 (2017a). Agricultural constraints on microbial resource use and niche breadth in drainage ditches.  
396 *PeerJ*, 5, e4175. <https://doi.org/10.7717/peerj.4175>
- 397 Hunting, E. R., Jong, S. D., & Vijver, M. G. (2017b). Assessment of monitoring tools and strategies  
398 safeguarding aquatic ecosystems within the European water framework directive. CML reports,  
399 192; 1-34.
- 400 Ieromina, O., Peijnenburg, W. J. G. M., Musters, C. J. M., & Vijver, M. G. (2015). The effect of  
401 pesticides on the composition of aquatic macrofauna communities in field ditches. *Basic and  
402 Applied Ecology*. <https://doi.org/10.1016/j.baae.2015.08.002>

- 403 Ieromina, O., Peijnenburg, W. J. G. M., Musters, C. J. M., & Vijver, M. G. (2016). The effect of  
404 pesticides on the composition of aquatic macrofauna communities in field ditches. *Basic and*  
405 *Applied Ecology*, 17(2), 125–133. <https://doi.org/10.1016/j.baae.2015.08.002>
- 406 Kampfraath, A. A., Hunting, E. R., Mulder, C., Breure, A. M., Gessner, M. O., & Kraak, M. H. S.  
407 (2012). DECOTAB : a multipurpose standard substrate to assess effects of litter quality on  
408 microbial decomposition and invertebrate consumption. *Freshwater Science*, 31(4), 1156–1162.  
409 <https://doi.org/10.1899/12-075.1>
- 410 Knezovich, J. P., Harrison, F. L. & Wilhelm, R. G. The bioavailability of sediment-sorbed organic  
411 chemicals: a review. *Water, Air, and Soil Pollution* 32(1-2), 233–245 (1987).
- 412 Krisp, H., & Maier, G. (2005). Consumption of macroinvertebrates by invasive and native gammarids:  
413 A comparison. *Journal of Limnology*, 64(1), 55–59. <https://doi.org/10.4081/jlimnol.2005.55>
- 414 Langenheder, S., Lindström, E. S., and Tranvik, L. J. (2005). Weak coupling between community  
415 composition and functioning of aquatic bacteria. *Limnol. Oceanogr.* 50, 957–967. doi:  
416 10.4319/lo.2005.50.3.0957
- 417 Myers, R. T., Zak, D. R., White, D. C., and Peacock, A. (2001). Landscape-level patterns of microbial  
418 composition and substrate use in upland forest ecosystems. *Soil Sci. Soc. Am. J.* 65, 359–367.  
419 doi: 10.2136/sssaj2001.652359x
- 420 Rask, M., & Hiisivuori, C. (1985). The predation on *Asellus aquaticus* (L.) by perch, *Perca fluviatilis*  
421 (L.), in a small forest lake. *Hydrobiologia*, 121(1), 27–33. <https://doi.org/10.1007/BF00035226>
- 422 Rossi, F., Pesce, S., Mallet, C., Margoum, C., Chaumot, A., Masson, M., & Artigas, J. (2018).  
423 Interactive effects of pesticides and nutrients on microbial communities responsible of litter  
424 decomposition in streams. *Frontiers in Microbiology*, 9(OCT), 1–13.  
425 <https://doi.org/10.3389/fmicb.2018.02437>
- 426 Rubach, M. N., Baird, D. J., Boerwinkel, M.-C., Maund, S. J., Roessink, I., & Van den Brink, P. J.  
427 (2012). Species traits as predictors for intrinsic sensitivity of aquatic invertebrates to the  
428 insecticide chlorpyrifos. *Ecotoxicology*, 21(7), 2088–2101. [https://doi.org/10.1007/s10646-012-](https://doi.org/10.1007/s10646-012-0962-8)  
429 0962-8
- 430 Schrama, M., Barmantlo, S. H., Hunting, E. R., van Logtestijn, R. S., Vijver, M. G., & van Bodegom,

- 431 P. M. (2017). Pressure-induced shifts in trophic linkages in a simplified aquatic food web.  
432 *Frontiers in Environmental Science*, 5, 75.
- 433 Seibold, S., Cadotte, M. W., MacIvor, J. S., Thorn, S., & Müller, J. (2018). The necessity of  
434 multitrophic approaches in community ecology. *Trends in ecology & evolution*, 33(10), 754-764.
- 435 Strayer, D L, & Dudgeon, D. (2010a). Freshwater biodiversity conservation: recent progress and  
436 future challenges. *Journal of the North American Benthological Society*, 29(February), 344–358.  
437 <https://doi.org/10.1899/08-171.1>
- 438 Strayer, David L. (2010b). Alien species in fresh waters: Ecological effects, interactions with other  
439 stressors, and prospects for the future. *Freshwater Biology*, 55, 152–174.  
440 <https://doi.org/10.1111/j.1365-2427.2009.02380.x>
- 441 Strickland, M. S., Lauber, C., Fierer, N., and Bradford, M. A. (2009). Testing the functional  
442 significance of microbial community composition. *Ecology* 90, 441–451. doi: 10.1890/08-0296.1
- 443 Tlili, A., Cornut, J., Behra, R., Gil-Allué, C., & Gessner, M. O. (2016). Harmful effects of silver  
444 nanoparticles on a complex detrital model system. *Nanotoxicology*, 10(6), 728–735.  
445 <https://doi.org/10.3109/17435390.2015.1117673>
- 446 Van der Lee, G. , Hunting E.R., Vonk, J.A., Kraak, M.H.S. (2020). DECOTABs: Decomposition and  
447 Consumption Tablets. In: Graça, M. A., Bärlocher, F., & Gessner, M. O. (Eds.). (2020). *Methods*  
448 *to study litter decomposition: a practical guide*. Springer Science & Business Media.
- 449 Vijver, M. G., Hunting, E. R., Nederstigt, T. A. P., Tamis, W. L. M., van den Brink, P. J., & van  
450 Bodegom, P. M. (2017). Postregistration monitoring of pesticides is urgently required to protect  
451 ecosystems. *Environmental Toxicology and Chemistry*, 36(4), 860–865.  
452 <https://doi.org/10.1002/etc.3721>
- 453 Vonk, J. A., Van Kuijk, B. F., Van Beusekom, M., Hunting, E. R., & Kraak, M. H. S. (2016). The  
454 significance of linoleic acid in food sources for detritivorous benthic invertebrates. *Scientific*  
455 *Reports*, 6(Cml), 1–7. <https://doi.org/10.1038/srep35785>
- 456 Vörösmarty, C. J., McIntyre, P. B., Gessner, M. O., Dudgeon, D., Prusevich, A., Green, P., ... Davies,  
457 P. M. (2010). Global threats to human water security and river biodiversity. *Nature*, 467(7315),  
458 555–561. <https://doi.org/10.1038/nature09440>

- 459 Wallace, J. B., & Webster, J. R. (1996). The role of macroinvertebrates in stream ecosystem function.  
460 *Annual Review of Entomology*, 41(131), 115–139. <https://doi.org/10.1146/annurev.ento.41.1.115>
- 461 Webster, J. R., & Benfield, E. F. (1986). Vascular plant breakdown in freshwater ecosystems. *Annual*  
462 *Review of Ecology and Systematics*. Vol. 17, (November 2003), 567–594.
- 463 Wright, M. S., & Covich, A. P. (2005). Relative importance of bacteria and fungi in a tropical  
464 headwater stream: leaf decomposition and invertebrate feeding preference. *Microbial ecology*,  
465 49(4), 536-546. <https://doi.org/10.1146/annurev.es.17.110186.003031>
- 466 Zhai, Y., Brun, N. R., Bundschuh, M., Schrama, M., Hin, E., Vijver, M. G., & Hunting, E. R. (2018).  
467 Microbially-mediated indirect effects of silver nanoparticles on aquatic invertebrates. *Aquatic*  
468 *Sciences*, 80(4), 44.
- 469 Zubrod, J. P., Bundschuh, M., & Schulz, R. (2010). Effects of subchronic fungicide exposure on the  
470 energy processing of *Gammarus fossarum* (Crustacea; Amphipoda). *Ecotoxicology and*  
471 *Environmental Safety*, 73(7), 1674–1680. <https://doi.org/10.1016/j.ecoenv.2010.07.046>
- 472
